# Supplementary material for: Li nucleation on the graphite anode under potential control in Li-ion batteries
Source: Royal Society of Chemistry journal article supplement (doi:10.1039/d2ta02420a), 2022-01-01
Supplement: d2ta02420a2.pdf [file d2ta02420a2.pdf]

# Li nucleation on the graphite anode under potential control in Li-ion batteries

Arihant Bhandari,<sup>†,‡</sup> Chao Peng,<sup>¶,‡</sup> Jacek Dziedzic,<sup>†,§,‡</sup> John R. Owen,<sup>†,‡</sup> Denis Kramer,<sup>¶,‡,||</sup> and Chris-Kriton Skylaris\*,<sup>†,‡</sup>

<sup>†</sup>*School of Chemistry, University of Southampton, Highfield, Southampton SO17 1BJ, United Kingdom*

<sup>‡</sup>*The Faraday Institution, Quad One, Becquerel Avenue, Harwell Campus, Didcot, OX11 0RA, United Kingdom*

<sup>¶</sup>*Engineering Sciences, University of Southampton, Southampton SO17 1BJ, United Kingdom*

<sup>§</sup>*Faculty of Applied Physics and Mathematics, Gdansk University of Technology, Gdansk 80-233, Poland*

<sup>||</sup> *Helmut-Schmidt-University, University of the Armed Forces, 22043 Hamburg, Germany*

E-mail: C.Skylaris@soton.ac.uk

# Supplementary Information

Files for all calculations are attached for reference and reproduction of results.

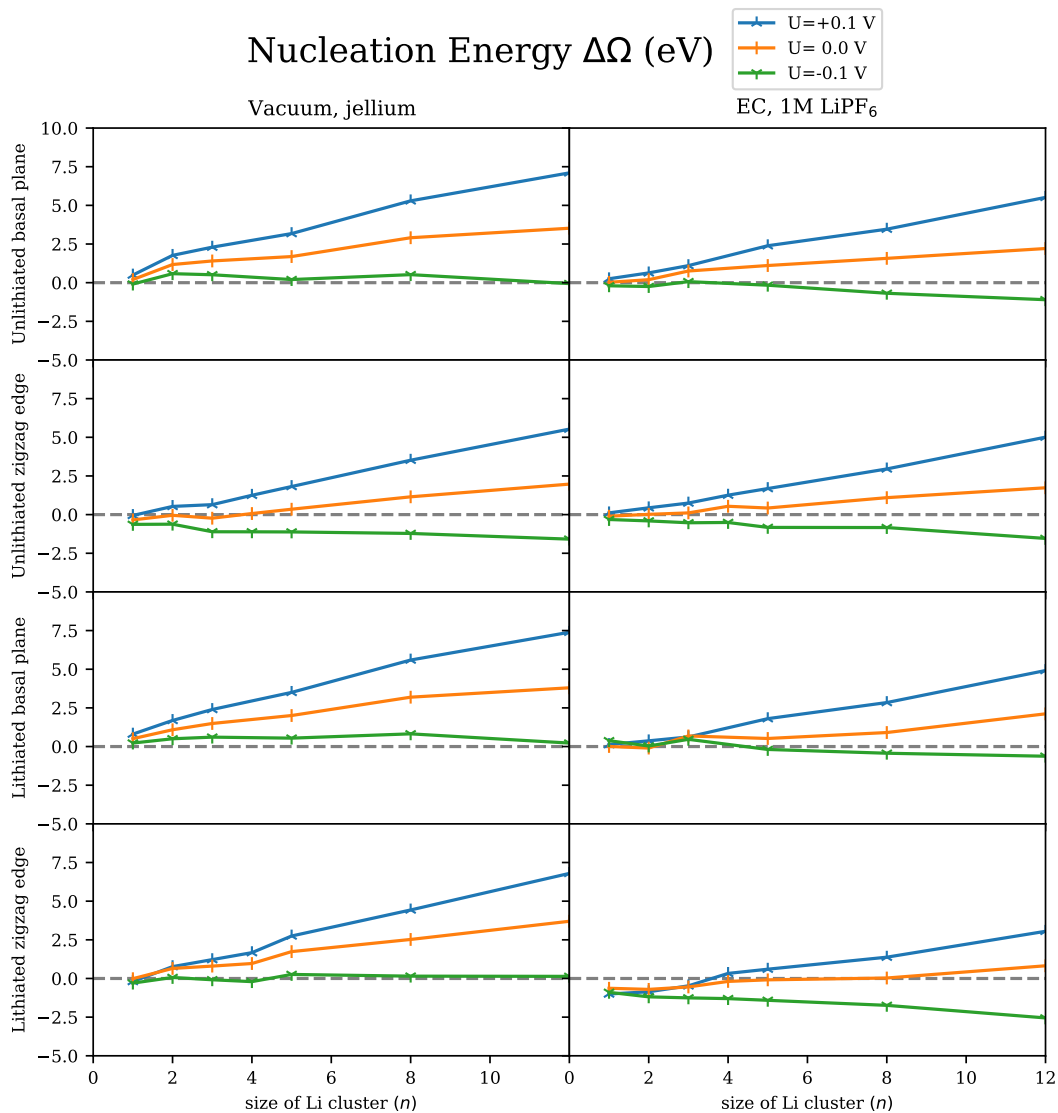

Figure S1: Enlarged plot of Fig. 2 for  $1 \leq n \leq 12$ .
